# Supplementary material for: Acceptable Salinity Level for Saline Water Irrigation of Tall Wheatgrass in Edaphoclimatic Scenarios of the Coastal Saline–Alkaline Land around Bohai Sea
Source: MDPI journal article supplement (doi:10.3390/agriculture13112117), 2023-11-08
Supplement: s1 [file s1]

## Supplementary files

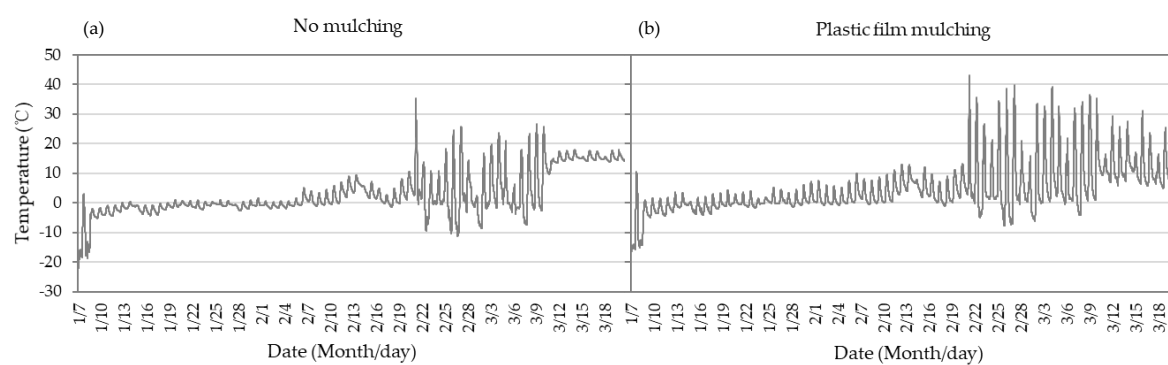

**Figure S1.** The variations of temperature in 10-cm soil depth from early January to mid-March in 2022 under no mulching (a) and plastic film mulching conditions (b).

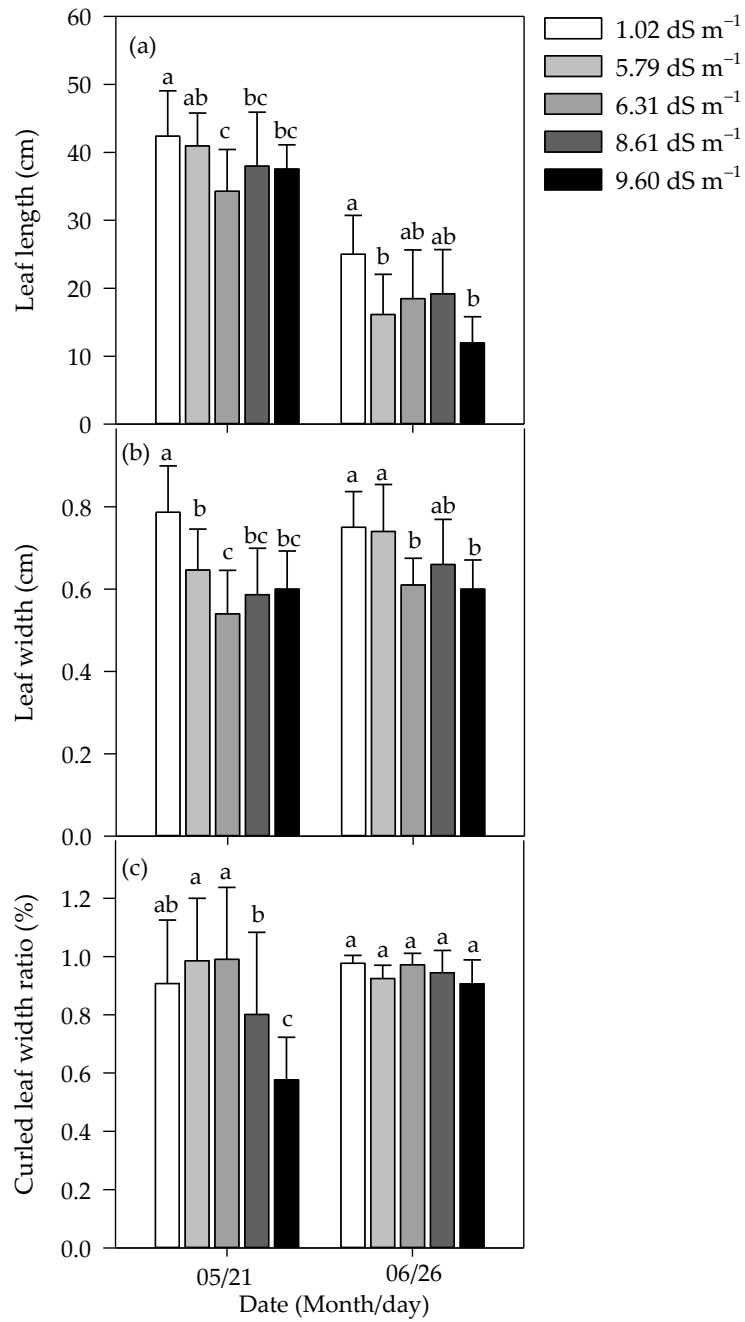

**Figure S2.** Leaf length (a), width (b), and curled width ratio (c) of tall wheatgrass irrigated with saline water. The data, collected on May 21 and June 26, were from the penultimate and flag leaves, respectively. Data are represented as mean  $\pm$  SD (n=10). Different letters indicate significant differences at  $p < 0.05$ .
